# Supplementary material
Source: PubMed Central journal article supplement (PMC1851576)

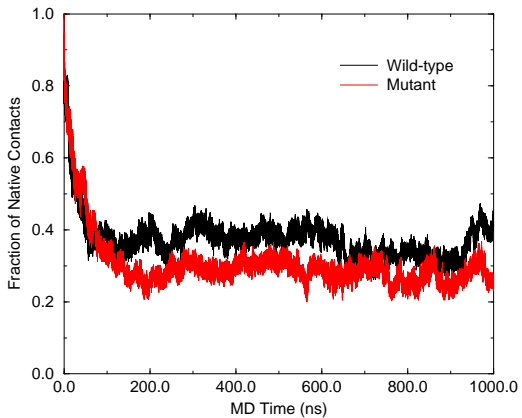

(a) Run 2

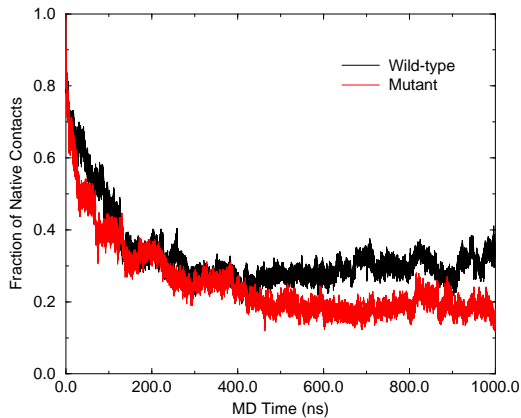

(b) Run 3

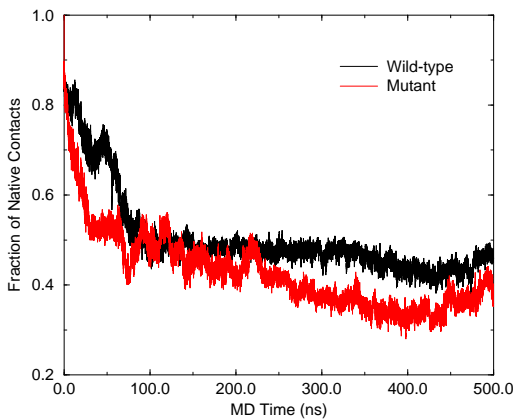

(c) Run 4

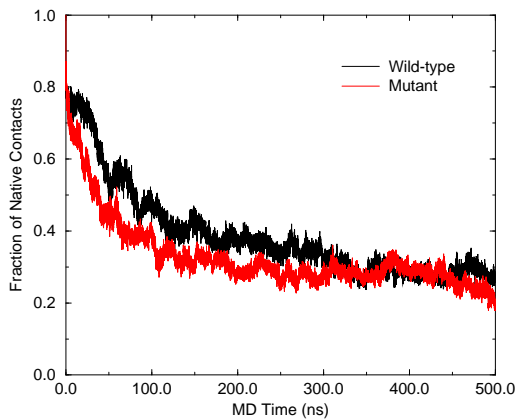

(d) Run 5

Supplement: pnas_0701249104_1.pdf [file pnas_0701249104_1.pdf]

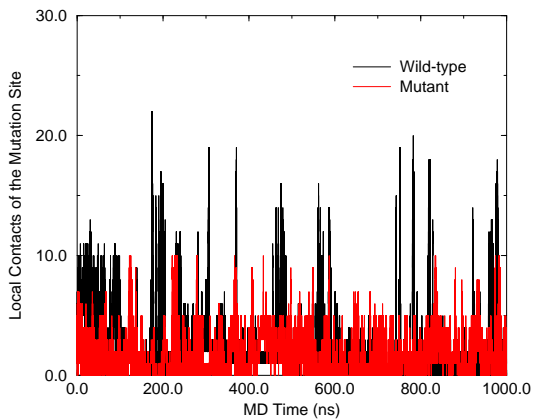

(a) Run 2

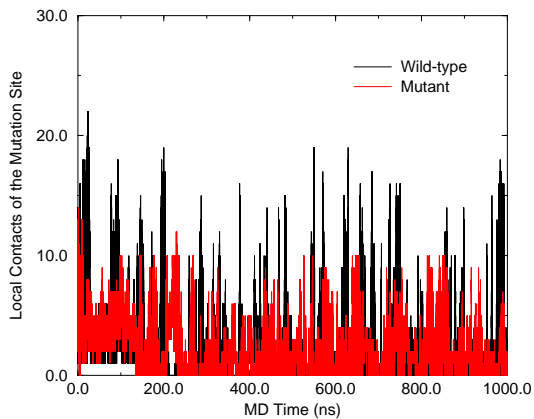

(b) Run 3

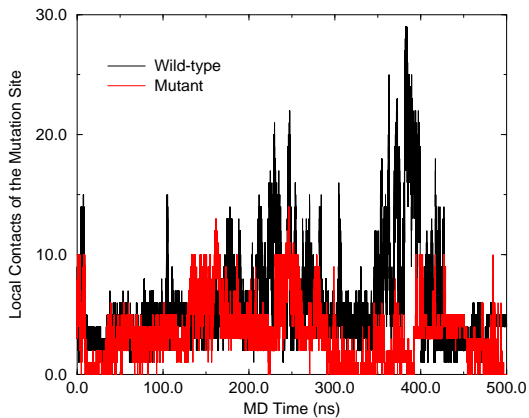

(c) Run 4

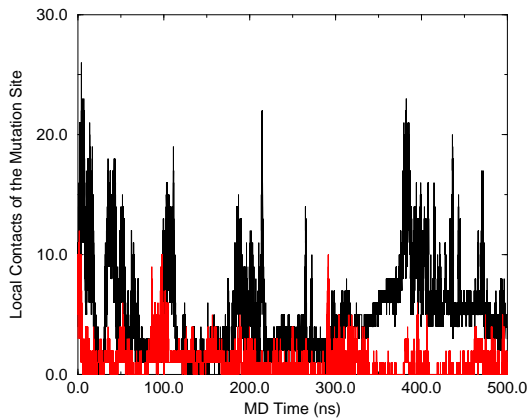

(d) Run 5

Supplement: pnas_0701249104_2.pdf [file pnas_0701249104_2.pdf]

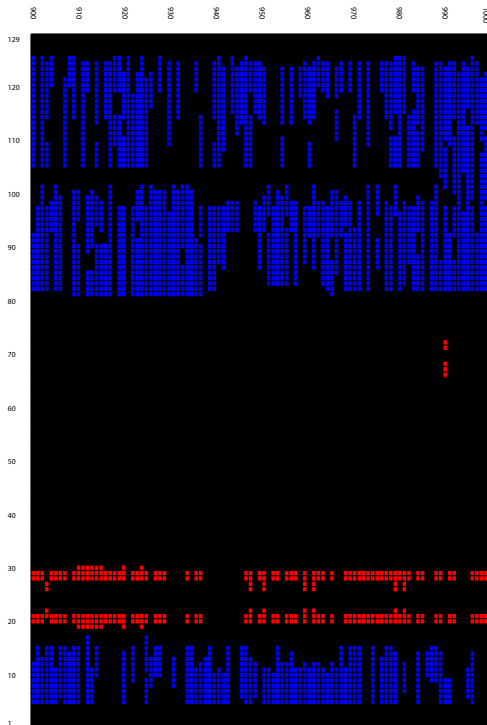

(a)

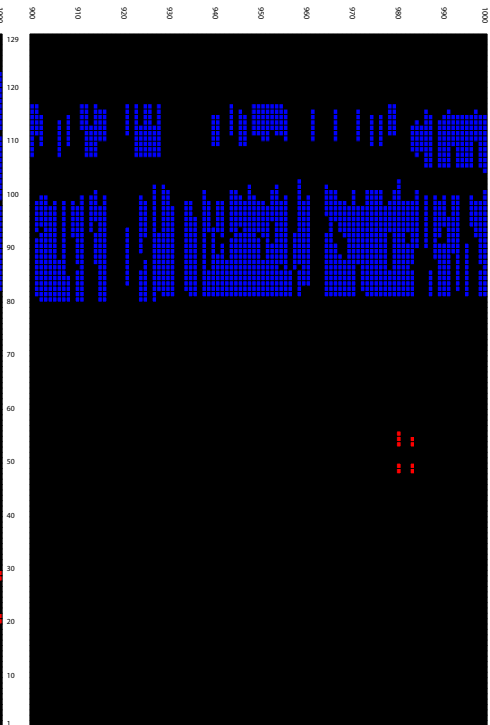

(b)

Supplement: pnas_0701249104_3.pdf [file pnas_0701249104_3.pdf]

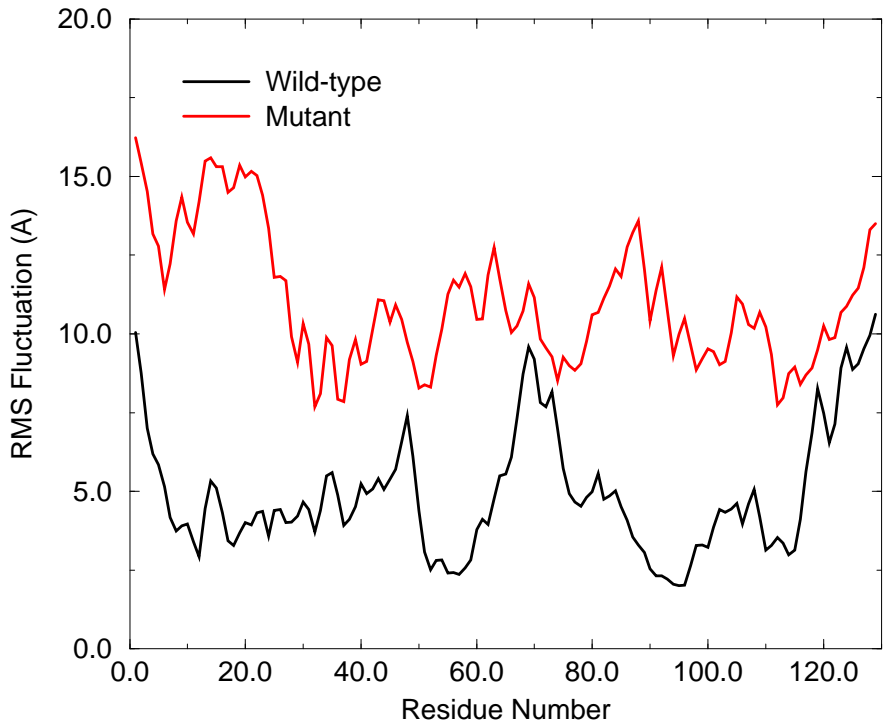

Supplement: pnas_0701249104_4.pdf [file pnas_0701249104_4.pdf]

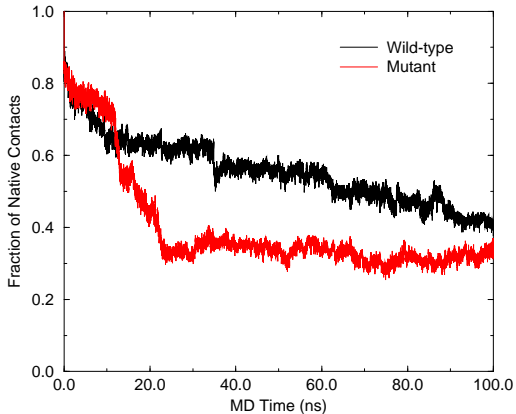

(a)

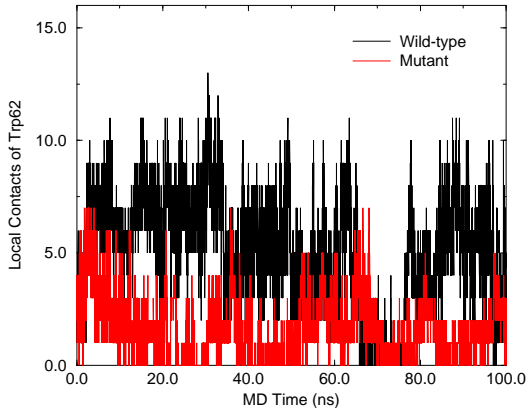

(b)

Supplement: pnas_0701249104_5.pdf [file pnas_0701249104_5.pdf]
